# Supplementary material for: Parenteral Nutrition, Sepsis, Acute Heart Failure and Hepatotoxic Drugs Are Related to Liver Test Disturbances in Critically Ill Patients
Source: MDPI journal article supplement (doi:10.3390/nu15112612), 2023-06-02
Supplement: s1 [file s1]

## Supplementary Materials

Table S1 includes a table regarding the composition of PN bags administered during this study.

Table S1: PN bag composition

| Composition     | N4E  | N5E  | N7E  | N7E  | N9E  | SMOFkabiven | Schema A (fluid restriction) | Schema C(less glucose) |
|-----------------|------|------|------|------|------|-------------|------------------------------|------------------------|
| Volume (mL)     | 1500 | 2000 | 1500 | 2000 | 1000 | 2463        | 1265                         | 2073                   |
| Aminoacids (g)  | 37.9 | 65.8 | 66.4 | 88.6 | 56.9 | 123         | 56.9                         | 114                    |
| Glucose (g)     | 113  | 230  | 210  | 280  | 110  | 313         | 275                          | 149                    |
| Lipids (g)      | 45   | 80   | 60   | 80   | 40   | 94          | 51                           | 104                    |
| Calories (kcal) | 1050 | 1980 | 1710 | 2270 | 1070 | 2700        | 1505                         | 1596                   |

Abbreviations: N nitrogen, number grams of nitrogen/liter PN, SMOF soy bean oil/middle chain triglycerides/Olive oil/Fish oil
